# Supplementary material
Source: PubMed Central journal article supplement (PMC1820923)

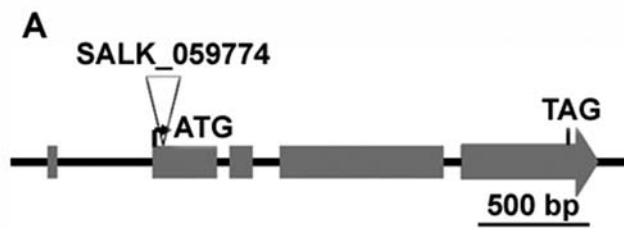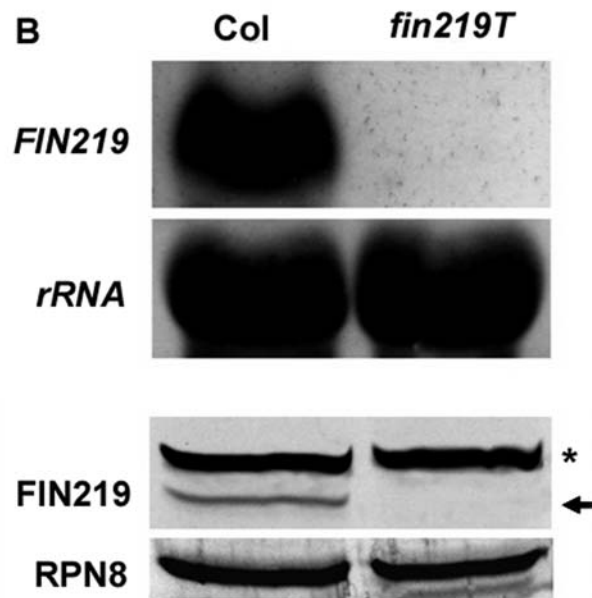

Supplement: plntphys_pp.106.094185_1.pdf [file plntphys_pp.106.094185_1.pdf]

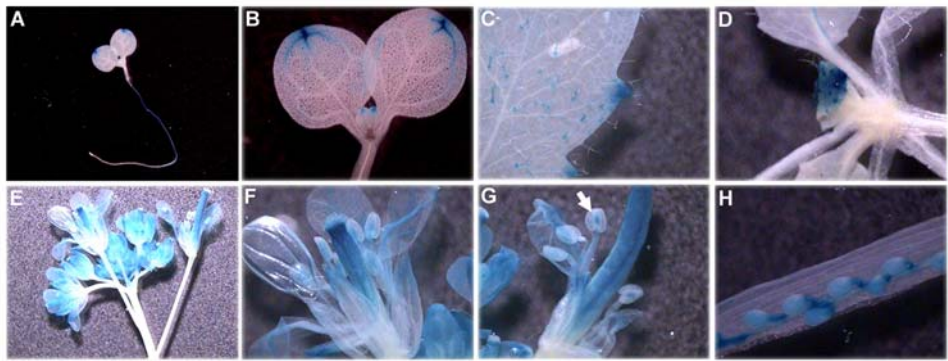

Supplement: plntphys_pp.106.094185_2.pdf [file plntphys_pp.106.094185_2.pdf]

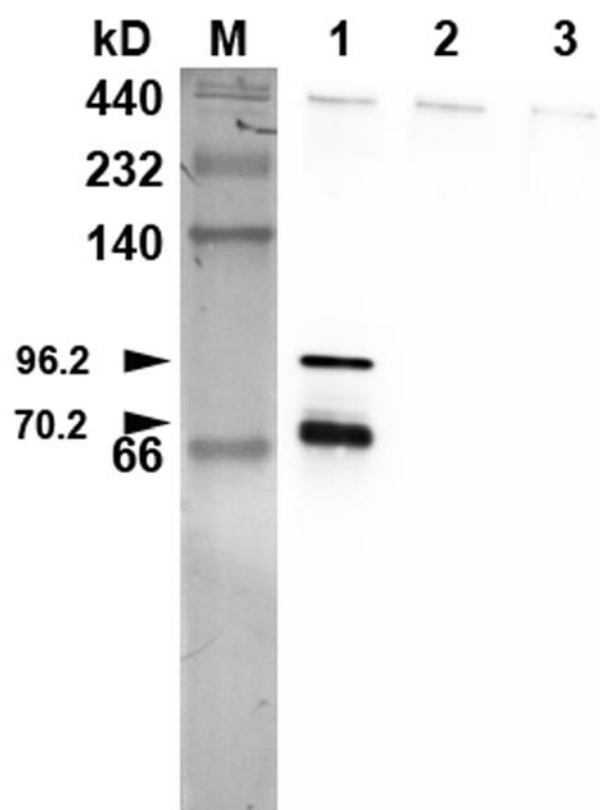

Supplement: plntphys_pp.106.094185_3.pdf [file plntphys_pp.106.094185_3.pdf]
